# Supplementary material for: Efficient hydrogenation of levulinic acid in water using a supported Ni–Sn alloy on aluminium hydroxide catalysts
Source: Royal Society of Chemistry journal article supplement (doi:10.1039/c5cy01731a), 2015-11-27
Supplement: c5cy01731a1.pdf [file c5cy01731a1.pdf]

Electronic Supplementary Information for

Efficient hydrogenation of levulinic acid in water using supported Ni-Sn alloy on aluminium hydroxide catalysts

Rodiansono,<sup>a\*</sup> Maria Dewi Astuti<sup>a</sup>, Takayoshi Hara,<sup>b</sup> Nobuyuki Ichikuni<sup>b</sup> and Shogo Shimazu<sup>\*b</sup>

<sup>a</sup>Department of Chemistry, Lambung Mangkurat University, Jl. A. Yani Km 36 Banjarbaru, Indonesia 70714. Telp./fax: +62-511-477 3112; E-mail address: [rodiansono@unlam.ac.id](mailto:rodiansono@unlam.ac.id) (Rodiansono).

<sup>b</sup>Graduate School of Engineering, Chiba University, 1-33 Yayoi, Inage, Chiba 263-8522, Japan, Tel./fax: +81 43 290 3379. E-mail address: [shimazu@faculty.chiba-u.jp](mailto:shimazu@faculty.chiba-u.jp) (S. Shimazu).

Ni-Sn alloy catalysts supported on aluminium hydroxide (denoted as Ni-Sn(x)/AlOH,  $x$  = Ni/Sn ratio) were prepared via the hydrothermal treatment of the mixture of R-Ni/AlOH) and SnCl<sub>2</sub>·2H<sub>2</sub>O solution with different Ni/Sn ratios. The physicochemical properties of Ni-Sn/AlOH are summarised in Table S1. Based on the ICP-AES analyses, the loading amount of Sn was 0.45, 0.75, 1.04, 2.14, and 3.96 mmol g<sup>-1</sup> which were reflected in the Ni/Sn ratio of 7.9, 3.7, 3.0, 1.4, and 1.0, respectively. The Ni/Al ratio confirmed the presence of aluminium hydroxide that resulted from the alkali leaching of the Raney Ni-Al alloy precursor in the form of gibbsite and bayerite as indicated by the XRD patterns.<sup>S1</sup>

Table S1 Chemical compositions, H<sub>2</sub>-, CO-, and N<sub>2</sub>-adsorption data ( $S_{\text{BET}}$ ), and mean nickel particle size for R-Ni/AlOH and Ni-Sn/AlOH

| Entry | Catalyst                     | Sn <sup>a</sup><br>(mmol g <sup>-1</sup> ) | Ni/Δ <sup>a</sup><br>(molar ratio) | H <sub>2</sub> uptake <sup>b/</sup><br>μmol g <sup>-1</sup> | CO uptake <sup>c/</sup><br>μmol g <sup>-1</sup> | $S_{\text{BET}}$ <sup>d/</sup><br>m <sup>2</sup> g <sup>-1</sup> | $D^e$ /nm       |
|-------|------------------------------|--------------------------------------------|------------------------------------|-------------------------------------------------------------|-------------------------------------------------|------------------------------------------------------------------|-----------------|
| 1     | R-Ni/AlOH                    | 0                                          | 0.91                               | 104                                                         | 81                                              | 151                                                              | 9.0             |
| 2     | Ni-Sn(7.9)/AlOH              | 0.45                                       | 1.04                               | 94                                                          | 85                                              | 77                                                               | 6.2             |
| 3     | Ni-Sn(3.7)/AlOH              | 0.75                                       | 1.10                               | 104                                                         | 82                                              | 82                                                               | 5.6             |
| 4     | Ni-Sn(3.0)/AlOH              | 1.04                                       | 1.05                               | 110                                                         | 91                                              | 90                                                               | 5.3             |
| 5     | Ni-Sn(3.0)/AlOH <sup>f</sup> | 1.02                                       | 1.05                               | 76                                                          | nd <sup>g</sup>                                 | 72                                                               | nd <sup>g</sup> |
| 6     | Ni-Sn(1.4)/AlOH              | 2.14                                       | 0.86                               | 102                                                         | 92                                              | 76                                                               | 4.1             |
| 7     | Ni-Sn(1.4)/AlOH <sup>f</sup> | 2.12                                       | 0.86                               | 32                                                          | nd <sup>g</sup>                                 | 27                                                               | nd <sup>g</sup> |
| 8     | Ni-Sn(1.0)/AlOH              | 3.96                                       | 0.68                               | 96                                                          | 91                                              | 72                                                               | 3.8             |

<sup>a</sup> Determined by ICP-AES. <sup>b</sup> Based upon total H<sub>2</sub> uptake at 273 K (noted after corrected for physical and chemical adsorption). <sup>c</sup> Based upon total CO uptake at 273 K (noted after corrected for physical and chemical adsorption). <sup>d</sup> Determined by N<sub>2</sub> adsorption at 77 K. <sup>e</sup> Average Ni particle sizes, calculated according to the method described in the literature.<sup>S2</sup> <sup>f</sup> After H<sub>2</sub> treatment at 273 K for 1 h. <sup>g</sup> Not determined.

The H<sub>2</sub> and CO uptakes, BET surface area ( $S_{\text{BET}}$ ), and the average Ni particle sizes of R-Ni/AlOH and Ni-Sn/AlOH catalysts are summarised in Table S1. With increasing the loading amount of Sn, H<sub>2</sub> and CO uptakes and BET surface area varied whereas the average Ni particle sizes decreased (Table 1, entries 1-6).

Thermo gravimetric-differential thermal analysis (TG-DTA) profiles for Ni-Sn(1.4)/AlOH fresh are shown in Fig. S1. TG curve shows that small amount of H<sub>2</sub>O and residue organic compound, i.e. ethanol was evaporated at 365-470 K. A significant loss of weight was observed at 521-551 K (approximately 14.6%) which corresponds to the transformation of gibbsite and bayerite into  $\gamma$ -alumina.<sup>S2-S4</sup> Furthermore, DTA curve shows a good agreement to the TG curve that an endotherm peak at 540 K which corresponds to the dehydration of bayerite or gibbsite to  $\gamma$ -alumina.<sup>S3</sup> In addition, neither weight loss nor an exothermal peak of the transformation of SnCl<sub>2</sub>·H<sub>2</sub>O into SnO<sub>2</sub> was observed at 600 K.<sup>S5</sup> These results suggest that SnCl<sub>2</sub>·2H<sub>2</sub>O precursor may reacted completely with metallic Ni to form Ni-Sn alloy.

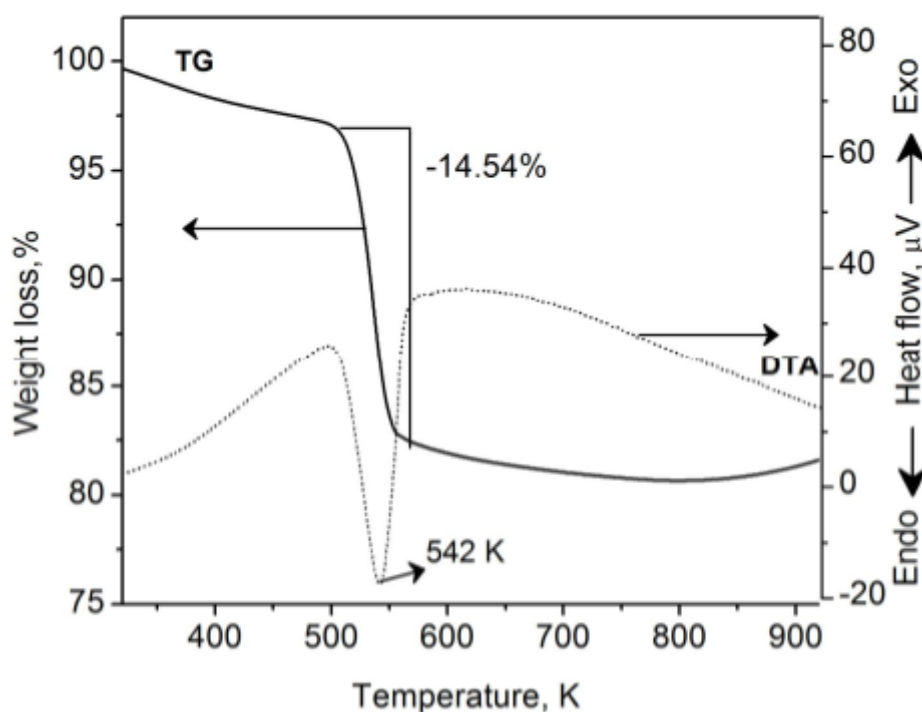

Fig. S1 Thermogram profiles of the *as prepared* Ni-Sn(1.4)/AlOH catalyst.

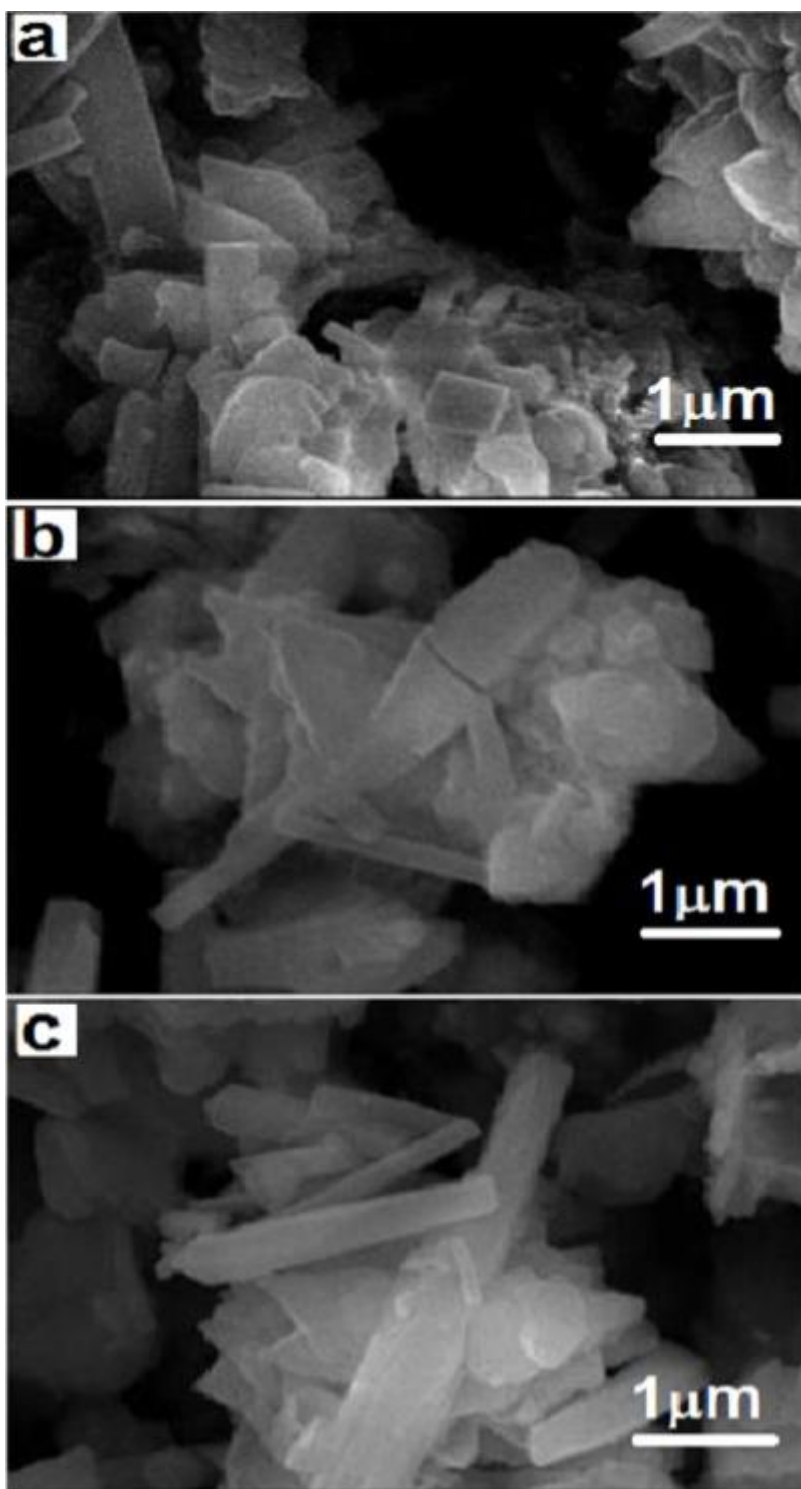

Fig. S2 SEM images of Ni-Sn(1.4)/AlOH catalysts. (a) fresh and H<sub>2</sub>-treated at (b) 673 K and (c) 773 K for 1 h.

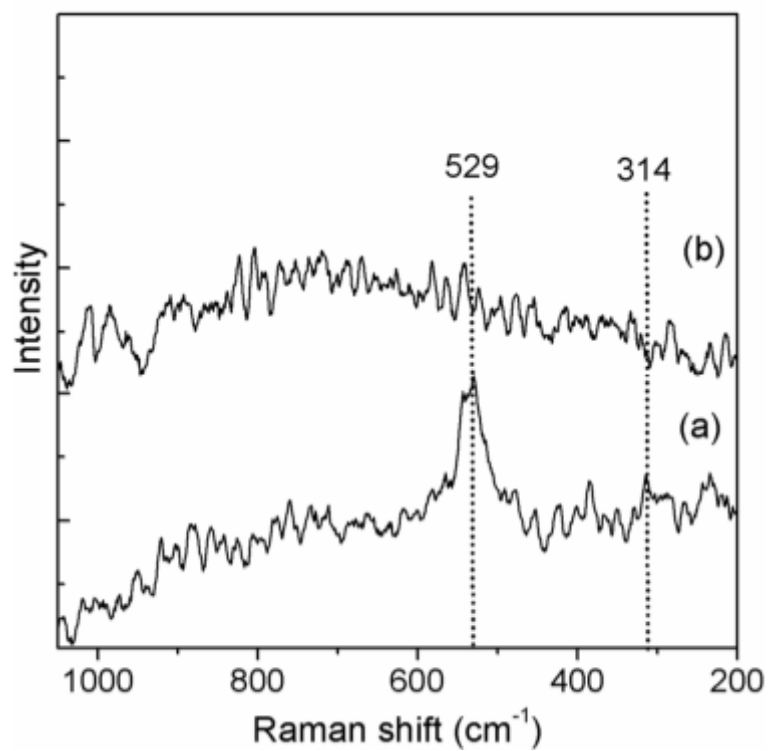

Fig. S3 Raman spectra of (a) the as-prepared Ni-Sn(1.4)/AlOH and (b)  $\text{H}_2$ -treated at 673 K for 1.5 h.

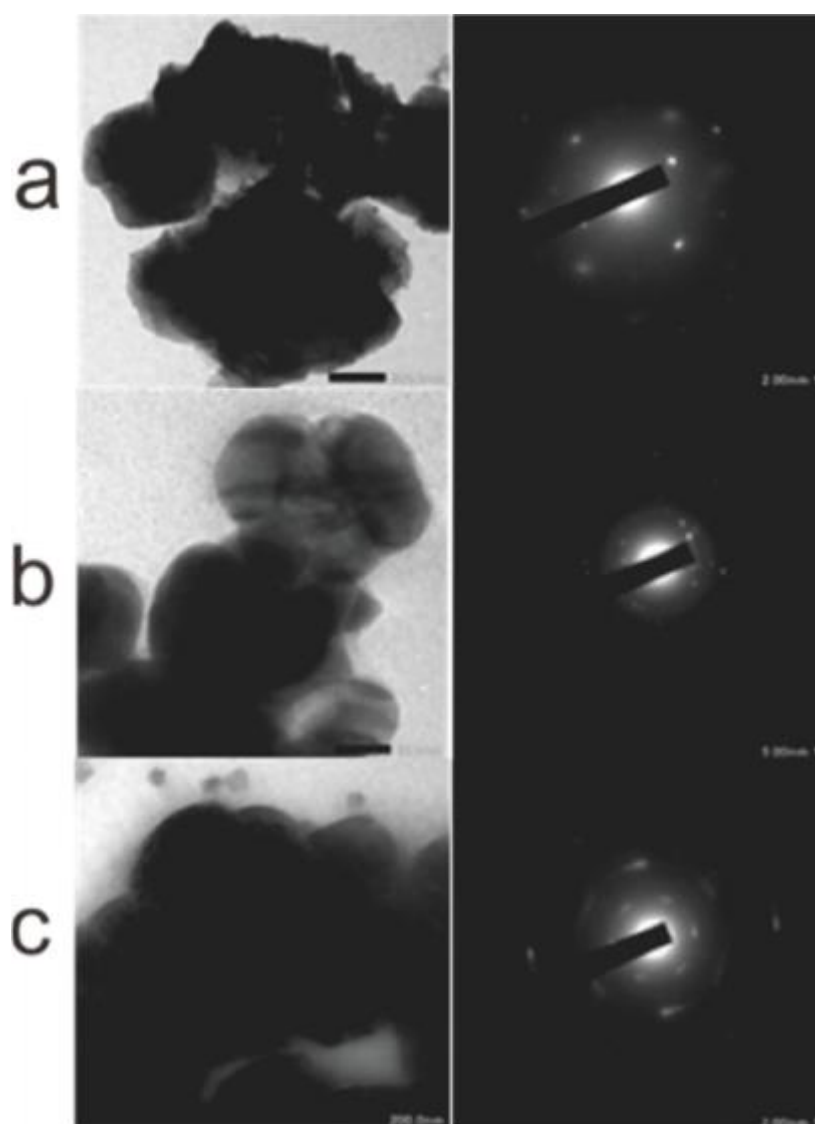

Fig. S4 TEM images and SAED for Ni-Sn(1.4)AlOH catalyst. (a) *as-prepared*, (b) after H<sub>2</sub> treatment at 673 K, and (c) recovered catalyst after the third reaction run.

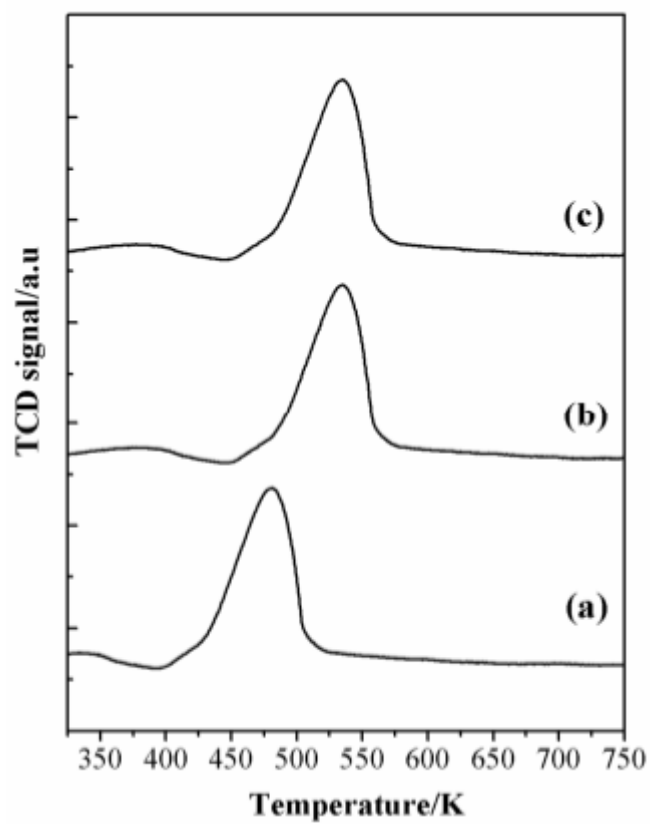

Fig. S5 Temperature programmed reduction of (a) the *as-prepared* and H<sub>2</sub>-treated Ni-Sn(1.4)/AlOH catalyst at (b) 673 K and (c) 773 K.

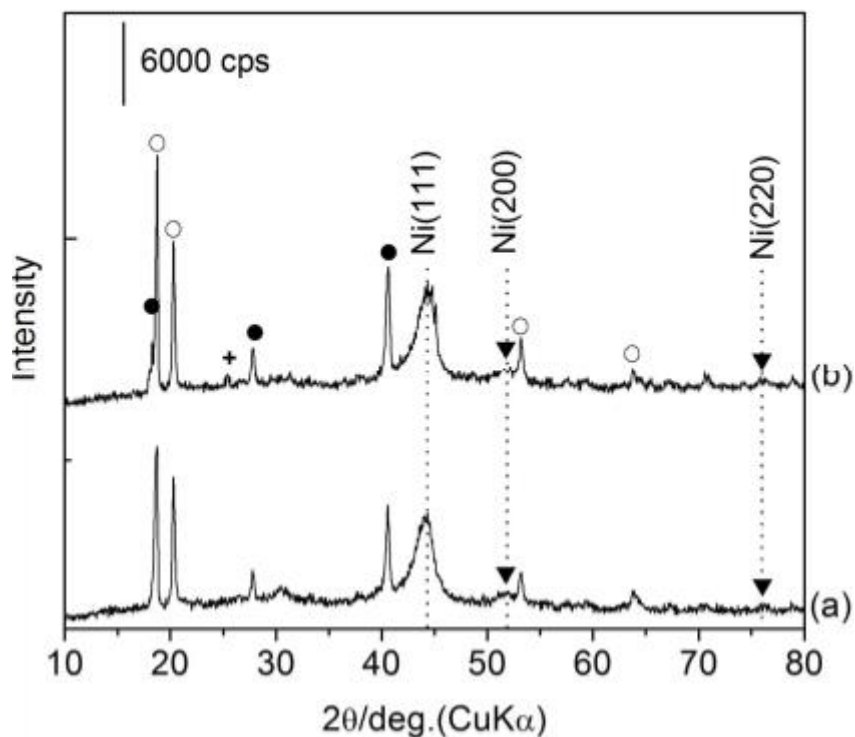

Fig. S6 XRD patterns of the recovered (a) Ni-Sn(1.4)/AlOH and (b) Ni-Sn(1.0)/AlOH catalysts. (□) bayerite; (□) gibbsite; (□) Sn; (●) Ni(0).

Table S2 Results of LA transformation over various Ni-M/AlOH (M= In, Ag, Zr, V, and Nb) catalysts

| Entry | Catalysts  | Conversion <sup>a</sup> /% | Yield <sup>b</sup> /% |     |     |
|-------|------------|----------------------------|-----------------------|-----|-----|
|       |            |                            | LE                    | GVL | HVA |
| 1     | Ni-In/AlOH | 57                         | 0                     | 57  | 0   |
| 2     | Ni-Ag/AlOH | 56                         | 0                     | 56  | 0   |
| 3     | Ni-Zr/AlOH | 53                         | 0                     | 53  | 0   |
| 4     | Ni-V/AlOH  | 13                         | 0                     | 13  | 0   |
| 5     | Ni-Nb/AlOH | 32                         | 0                     | 32  | 0   |

*Reaction conditions:* catalyst (0.05 g), LA (2 mmol), solvent (3 mL), H<sub>2</sub> (4.0 MPa), 393 K, 120 min. <sup>a</sup> Conversion of LA. <sup>b</sup> Determined by GC using an internal standard technique; LE = levulinic ester; GVL =  $\gamma$ -valerolactone; HVA = hydroxyvaleric acid.

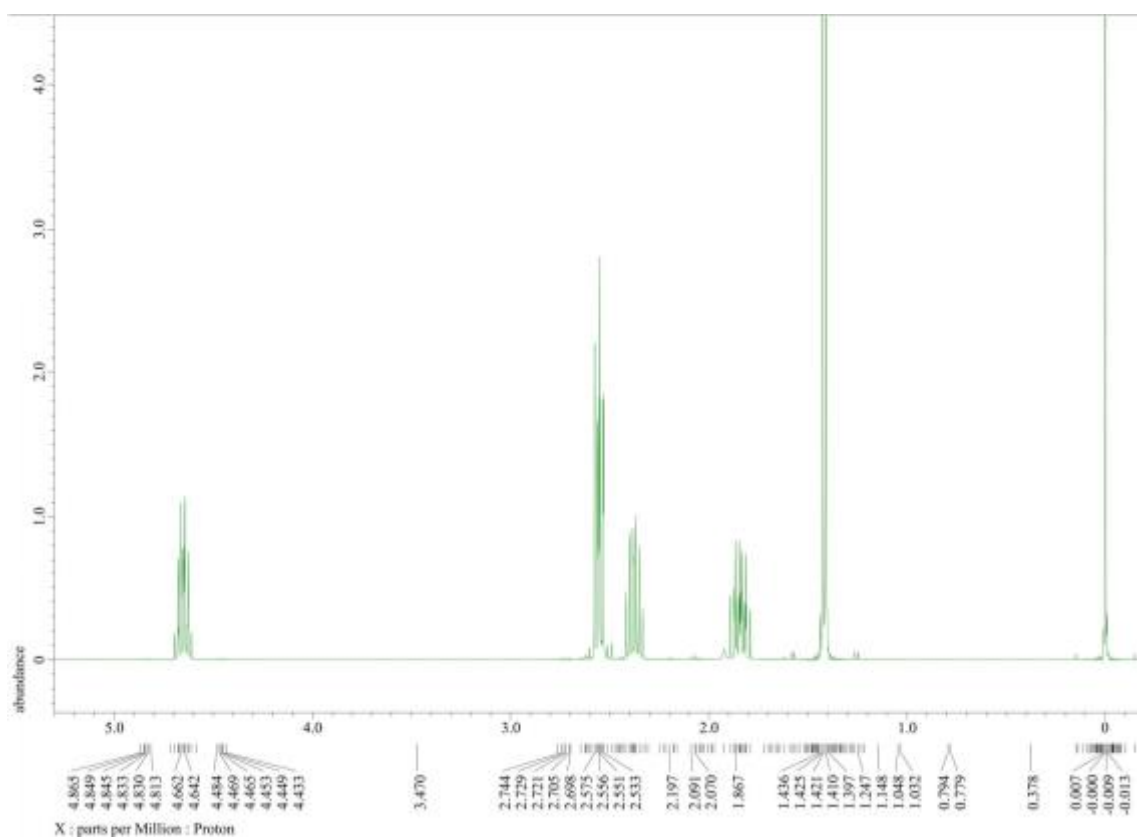

Fig. S7  $^1\text{H}$  NMR spectra of synthesised  $\gamma$ -valerolactone from hydrogenation of levulinic acid in water over Ni-Sn(1.4)/AlOH catalysts.



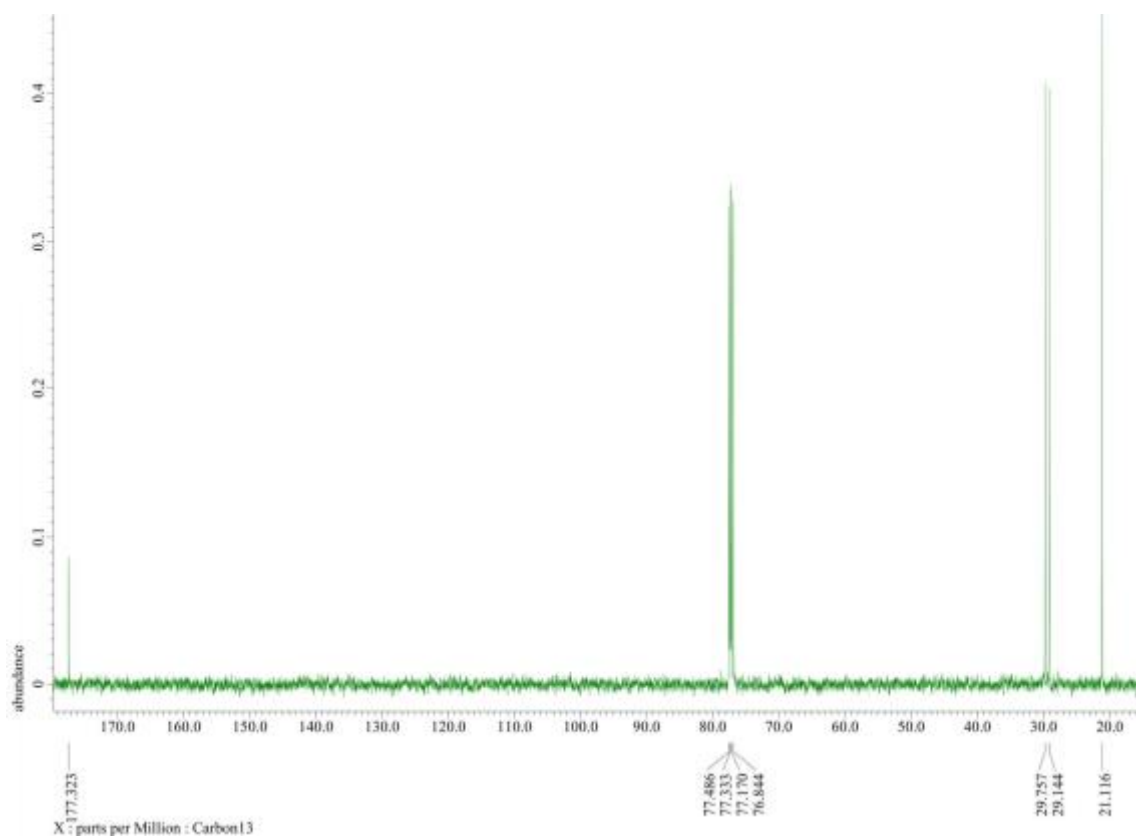

Fig. S8  $^{13}\text{C}$  NMR spectra of synthesised  $\gamma$ -valerolactone from hydrogenation of levulinic acid in water over Ni-Sn(1.4)/AlOH catalysts.

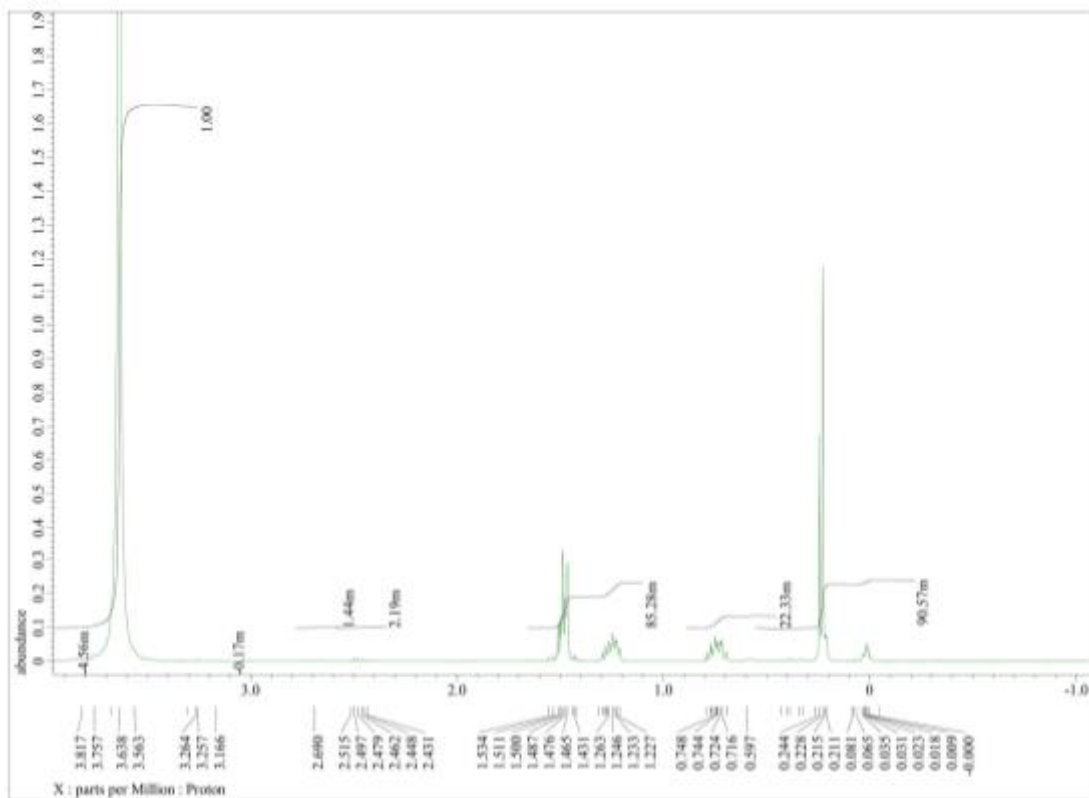

Fig. S9  $^1\text{H}$  NMR spectra of synthesised  $\gamma$ -valerolactone from hydrogenation of levulinic acid in  $\text{D}_2\text{O}$  over  $\text{Ni-Sn}(1.4)/\text{AlOH}$  catalysts.<sup>S7</sup>

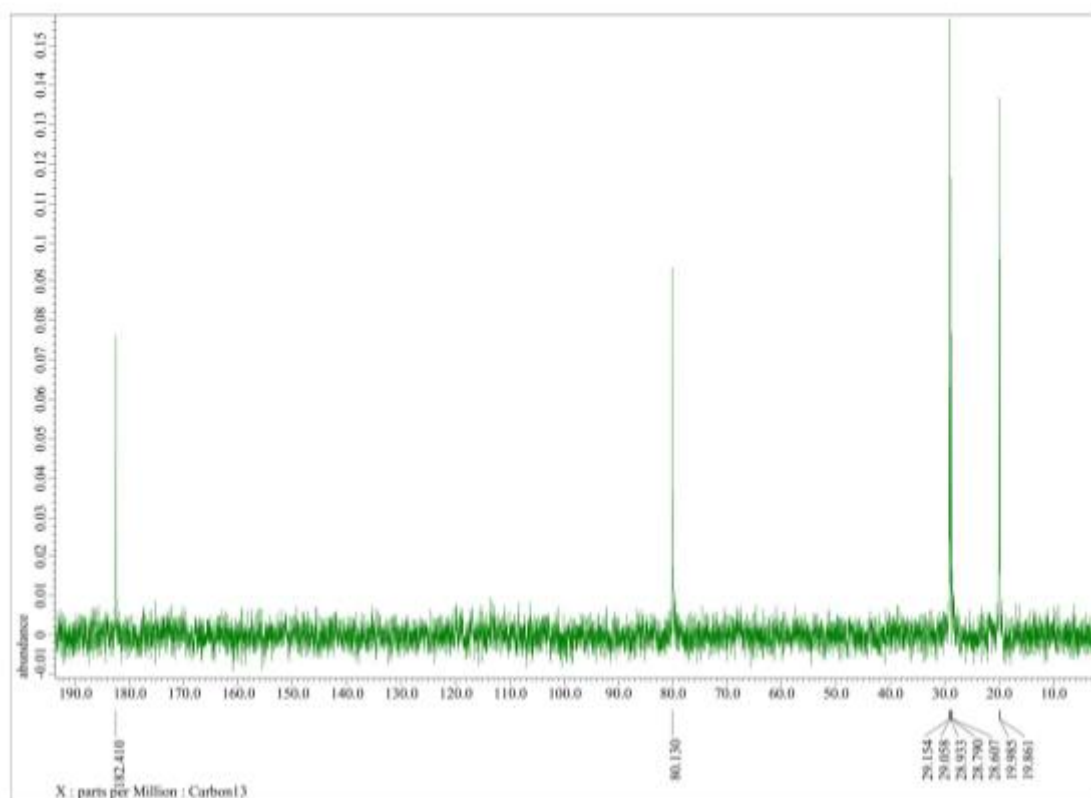

Fig. S10  $^{13}\text{C}$  NMR spectra of synthesised  $\gamma$ -valerolactone from hydrogenation of levulinic acid in D<sub>2</sub>O over Ni-Sn(1.4)/AlOH catalysts.<sup>S7</sup>

## References

- S1 Rodiansono, T. Hara, N. Ichikuni, and S. Shimazu, *Chem Lett.*, 2012, 41, 769-771.  
 S2 T. Tsuchida, T. Ishii, R. Furuichi, and H. Haga, *Thermochim. Acta* 1979, 34, 19-28.  
 S3 T. Tsuchida and N. Ichikawa, *React. Solids*, 1989, 7, 207-217.  
 S4 (a) C. H. Bartholomew, R. B. Pannel, and J. L. Butler, *J. Catal.* 1980, 65, 335-347. (b) C. H. Bartholomew and R. B. Pannel, *J. Catal.* 1980, 65, 390-401.  
 S5 K. J. D. MacKenzie, J. Temuujin, and K. Okada, *Thermochim. Acta* 1999, 327, 103-108.  
 S6 Q. F. Dong, C. Z. Wu, M. G. Jin, Z. C. Huang, M. S. Zheng, J. K. You, and Z. G. Lin, *Solid State Ionics* 2004, 167, 49-54.  
 S7 J. Tan, J. Cui, T. Deng, X. Cui, G. Ding, Y. Zhu, and Y. Li, *ChemCatChem*, 2015, 7, 508-512.
